# Supplementary material for: Copper (II)-Catalyzed Oxidation of Ascorbic Acid: Ionic Strength Effect and Analytical Use in Aqueous Solution
Source: MDPI journal article supplement (doi:10.3390/inorganics10070102), 2022-07-18
Supplement: s1 [file s1]

# Supporting Information for

## **Copper(II)-Catalyzed Oxidation of Ascorbic Acid: Ionic Strength Effect and Analytical Use in Aqueous Solution**

**A.E. Murekhina<sup>1</sup>, D.N. Yarullin<sup>1</sup>, M.A. Sovina<sup>2</sup>, P.A. Kitaev<sup>2</sup> and G.A. Gamov<sup>1,\*</sup>**

<sup>1</sup> Ivanovo State University of Chemistry and Technology; ggamov@isuct.ru

<sup>2</sup> Municipal Autonomous Institution "Lyceum №21"; sovina.mary@yandex.ru

\* Correspondence: ggamov@isuct.ru; Tel.: +7(915)821 85 62

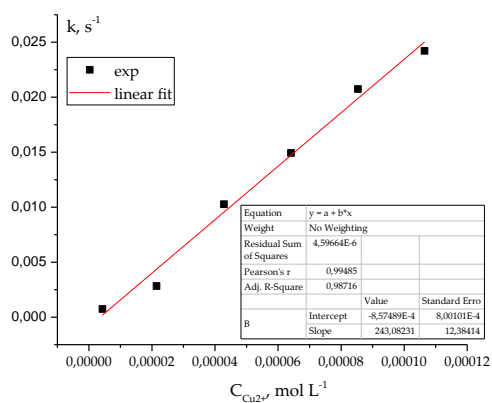

(a)

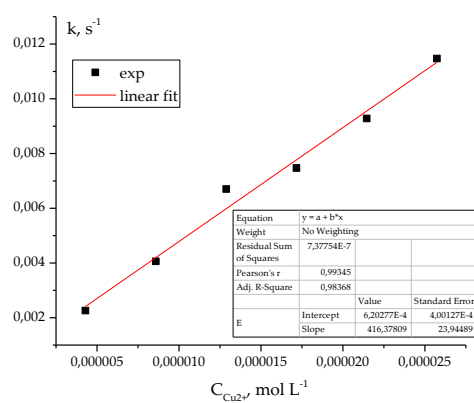

(b)

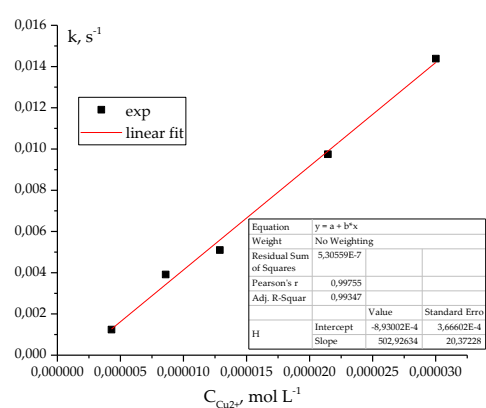

(c)

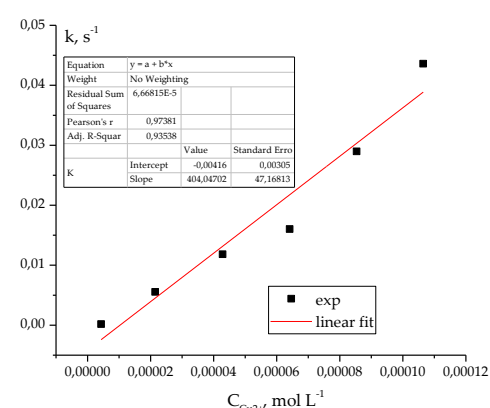

(d)

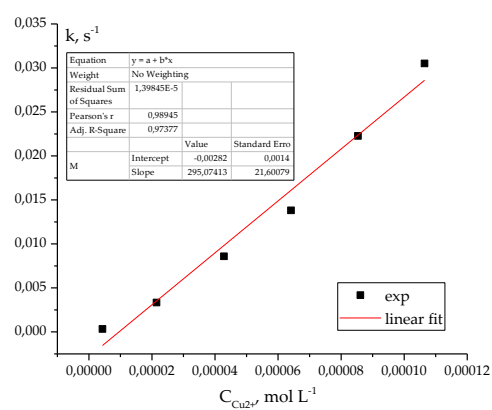

(e)

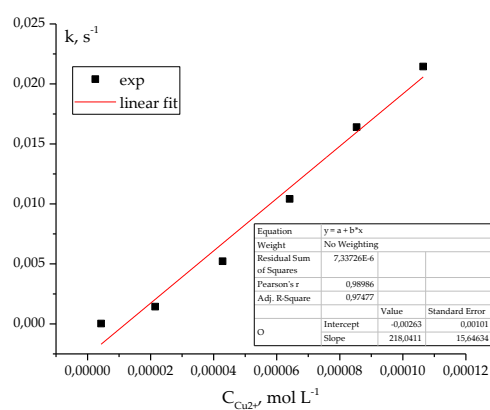

(f)

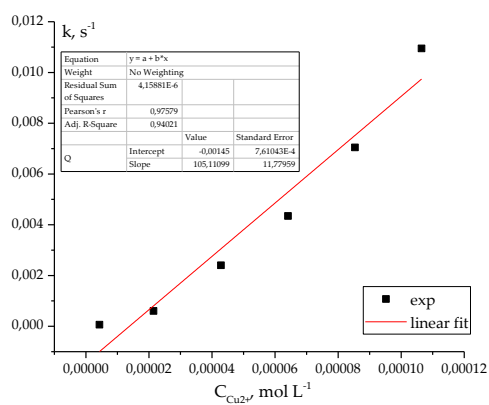

(g)

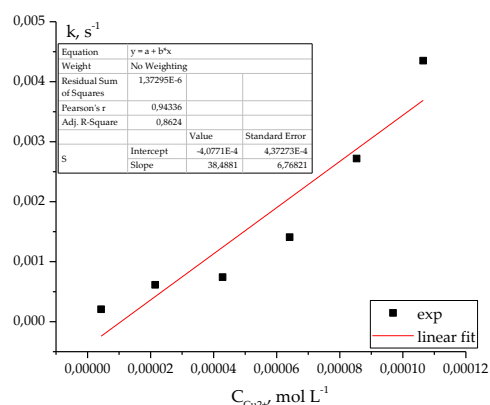

(h)

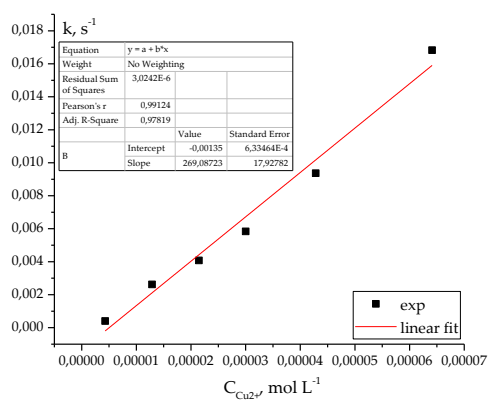

(i)

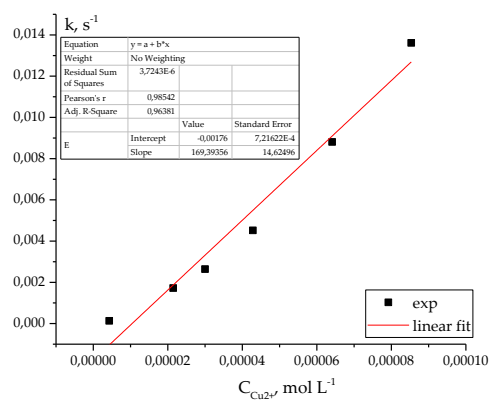

(j)

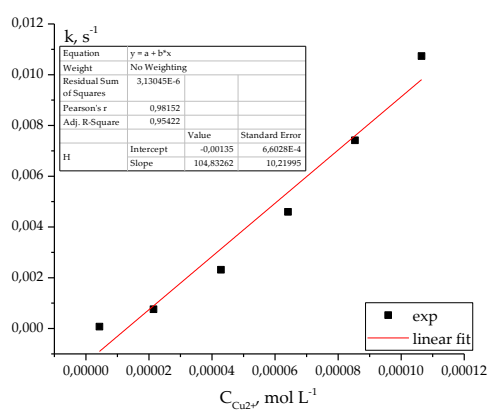

(k)

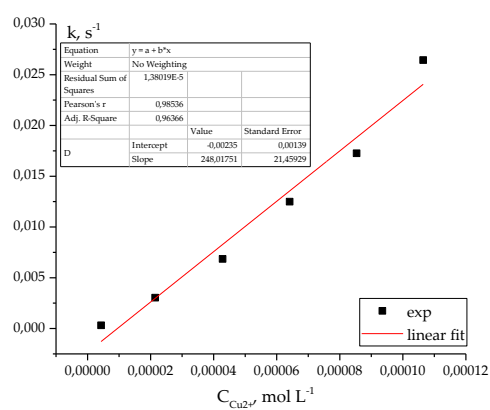

(l)

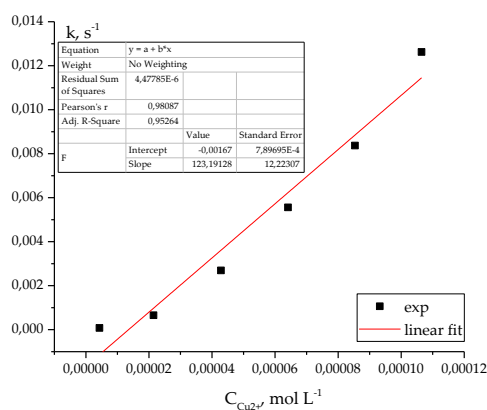

(m)

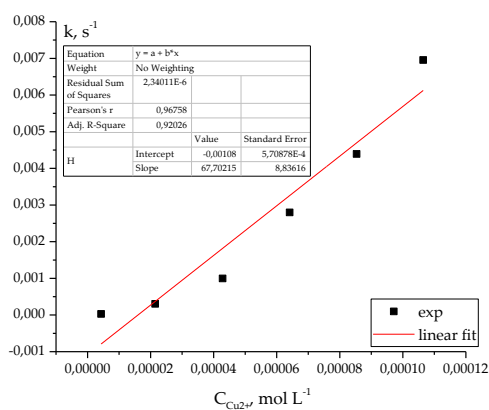

(n)

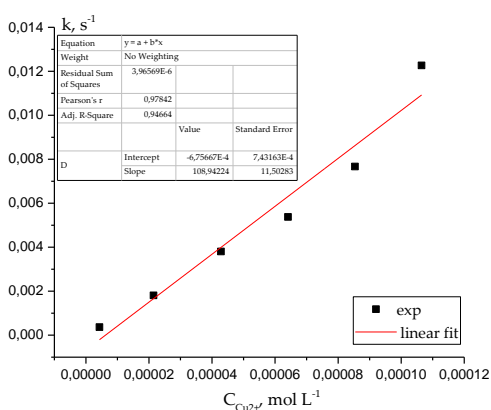

(o)

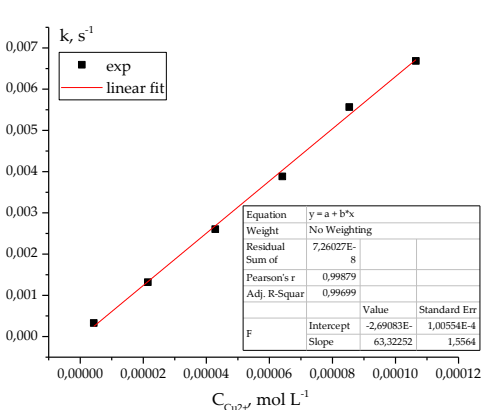

(p)

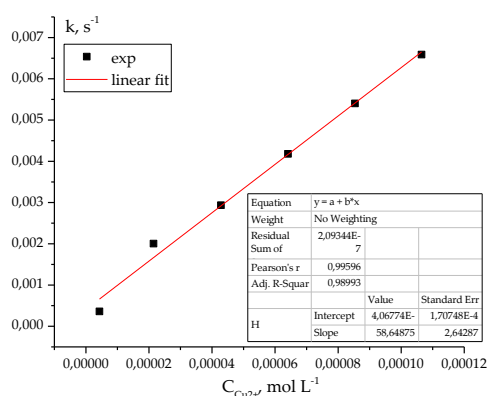

(q)

**Figure S1.** Linear fitting of the dependencies of an apparent rate constant of ascorbic acid autooxidation induced by  $\text{Cu}^{2+}$  ions in aqueous medium at ionic strength set by: (a) none, 0 mol  $\text{L}^{-1}$ ; (b) NaCl, 0.01 mol  $\text{L}^{-1}$ ; (c) NaCl, 0.025 mol  $\text{L}^{-1}$ ; (d) NaCl, 0.05 mol  $\text{L}^{-1}$ ; (e) NaCl, 0.075 mol  $\text{L}^{-1}$ ; (f) NaCl, 0.10 mol  $\text{L}^{-1}$ ; (g) NaCl, 0.17 mol  $\text{L}^{-1}$ ; (h) NaCl, 0.25 mol  $\text{L}^{-1}$ ; (i) KCl, 0.05 mol  $\text{L}^{-1}$ ; (j) KCl, 0.10 mol  $\text{L}^{-1}$ ; (k) KCl, 0.15 mol  $\text{L}^{-1}$ ; (l)  $\text{NaClO}_4$ , 0.05 mol  $\text{L}^{-1}$ ; (m)  $\text{NaClO}_4$ , 0.10 mol  $\text{L}^{-1}$ ; (n)  $\text{NaClO}_4$ , 0.15 mol  $\text{L}^{-1}$ ; (o)  $\text{KNO}_3$ , 0.05 mol  $\text{L}^{-1}$ ; (p)  $\text{KNO}_3$ , 0.10 mol  $\text{L}^{-1}$ ; (q)  $\text{KNO}_3$ , 0.15 mol  $\text{L}^{-1}$
